# Supplementary material for: Graphene nanosheet-tailored PtPd concave nanocubes with enhanced electrocatalytic activity and durability for methanol oxidation
Source: Royal Society of Chemistry journal article supplement (doi:10.1039/c3nr06186h), 2014-01-01
Supplement: c3nr06186h.pdf [file c3nr06186h.pdf]

Electronic Supplementary Information

**Graphene Nanosheets-Tailored PtPd Concave Nanocubes with Enhanced  
Electrocatalytic Activity and Durability for Methanol Oxidation**

Yizhong Lu,<sup>a,b</sup> Yuanyuan Jiang<sup>a,b</sup> and Wei Chen<sup>\*a</sup>

*<sup>a</sup>State Key Laboratory of Electroanalytical Chemistry, Changchun Institute of Applied  
Chemistry, Chinese Academy of Sciences, Changchun 130022, Jilin, China, and*

*<sup>b</sup>University of Chinese Academy of Sciences, Beijing 100039, China*

E-mail: [weichen@ciac.ac.cn](mailto:weichen@ciac.ac.cn)

## Supplementary Results

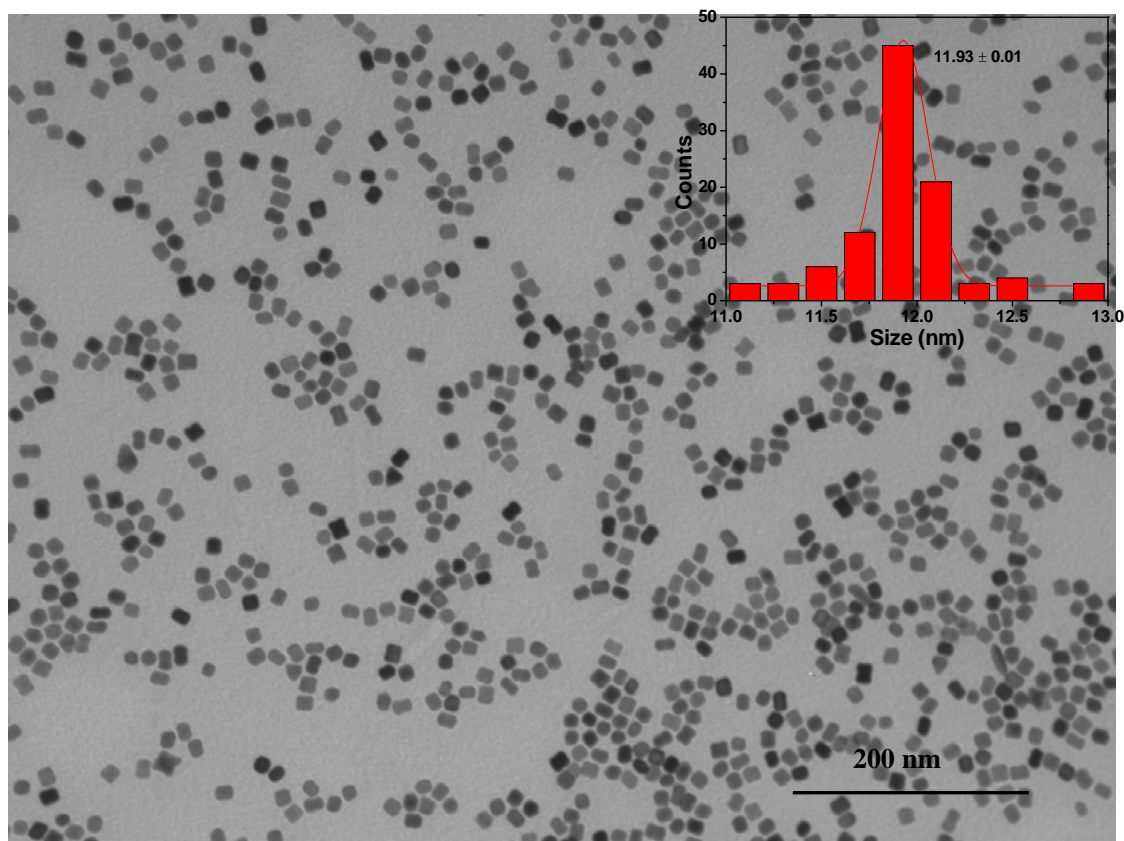

**Fig. S1** Representative TEM image of the unsupported PtPd alloy nanocubes synthesized in the absence of GO. The inset shows the particle size distribution histogram.

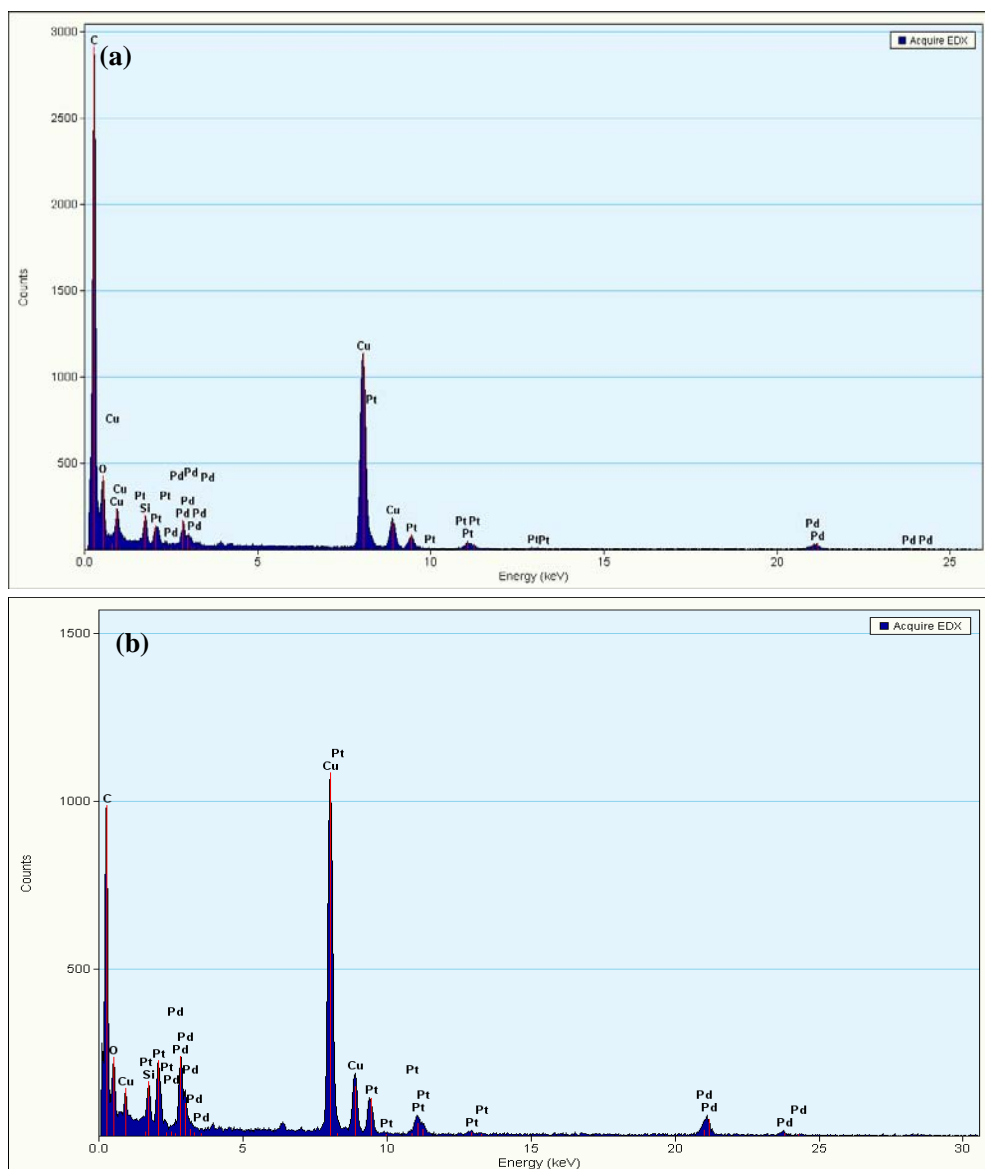

**Fig. S2** Energy-dispersive X-ray analysis (EDX) of the C-PtPd/RGO (a) and unsupported PtPd alloy nanocubes (b). (The carbon and Cu peaks come from the carbon film and Cu grid, respectively, for TEM measurements).

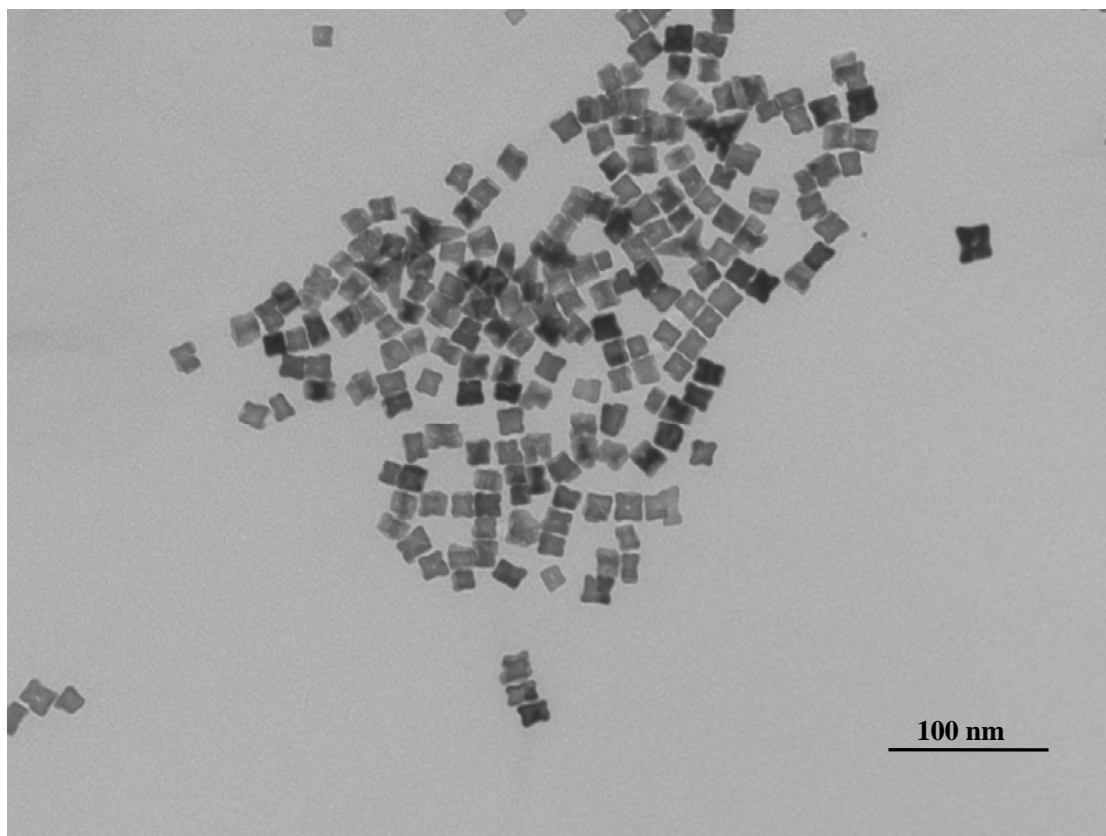

**Fig. S3** TEM image of PtPd concave alloy nanocubes collected at the reaction time of 8 h.

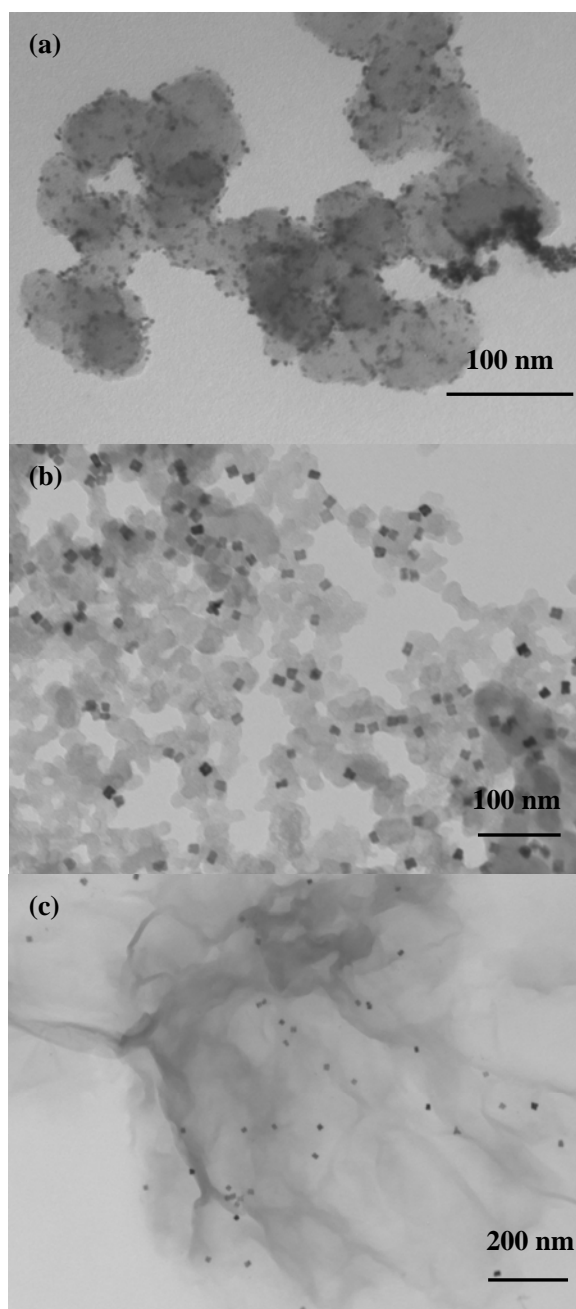

**Fig. S4** TEM images of (a) commercial Pt/C, (b) PtPd alloy nanocubes supported on Vulcan XC-72 Carbon black (PtPd/C), and (c) PtPd alloy nanocubes supported on RGO surface (PtPd/RGO).

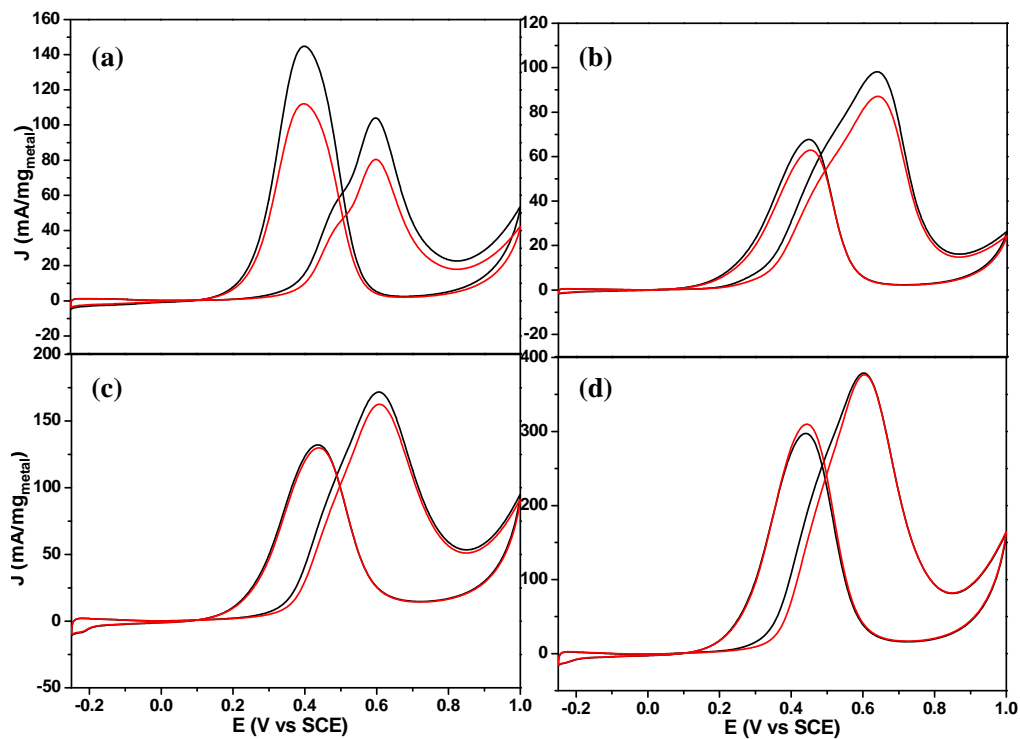

**Fig. S5** The 1<sup>st</sup> (black curves) and 1000<sup>th</sup> (red curves) CV curves obtained on (a) commercial Pt/C, (b) PtPd/C, (c) PtPd/RGO, and (d) C-PtPd/RGO in 0.5 M H<sub>2</sub>SO<sub>4</sub> + 0.5 M CH<sub>3</sub>OH solution. Potential scan rate of 50 mV s<sup>-1</sup>.
